# Supplementary material
Source: MDPI journal article supplement (https://www.mdpi.com/2673-7264/2/3/15)
Supplement: s1 [file s1]

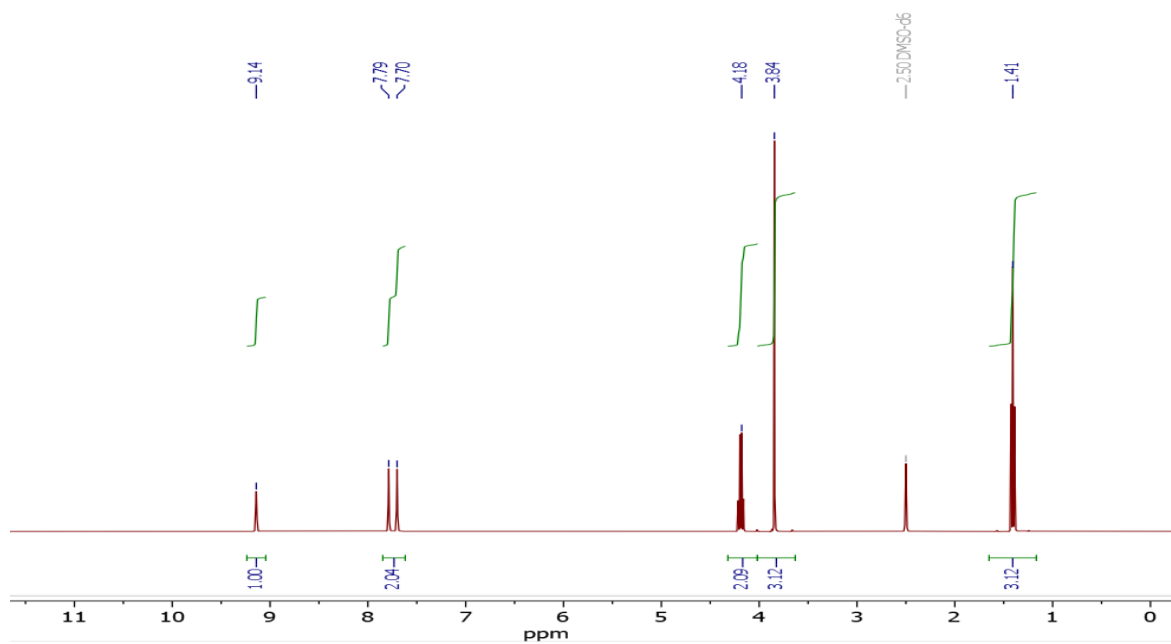

**Figure S1:** <sup>1</sup>H NMR of 1-ethyl-3-methylimidazolium hydrogensulfate

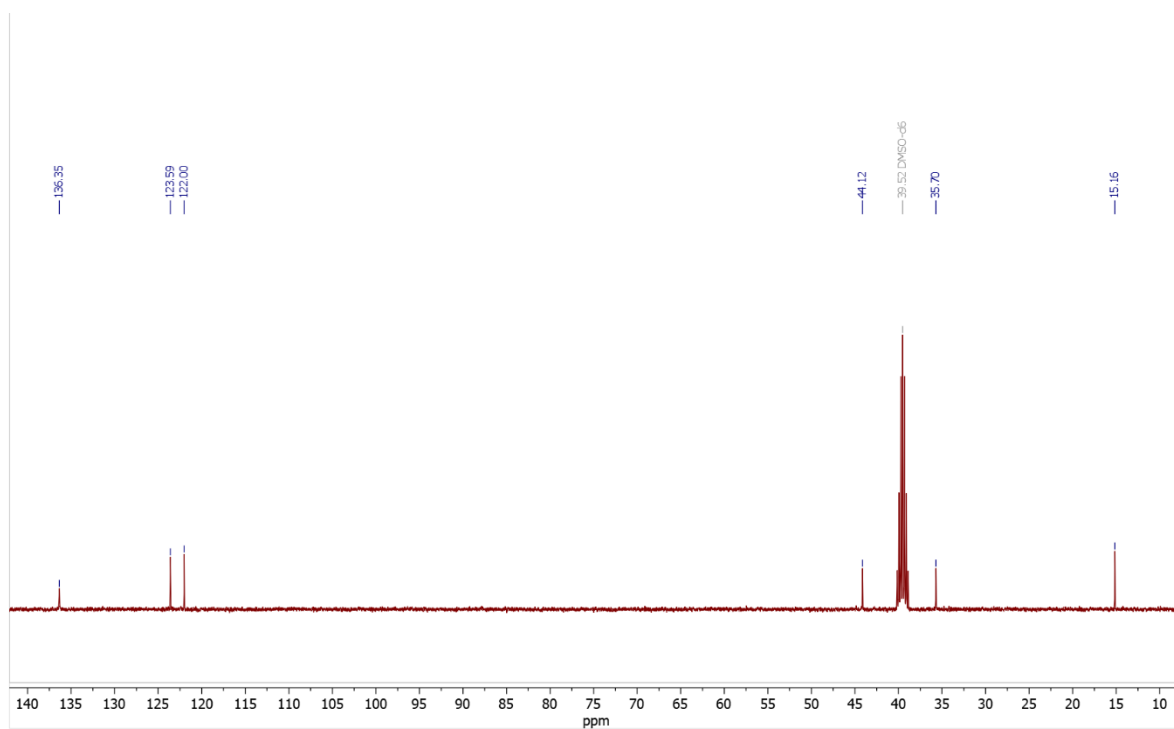

**Figure S2:** <sup>13</sup>C NMR of 1-ethyl-3-methylimidazolium hydrogensulfate

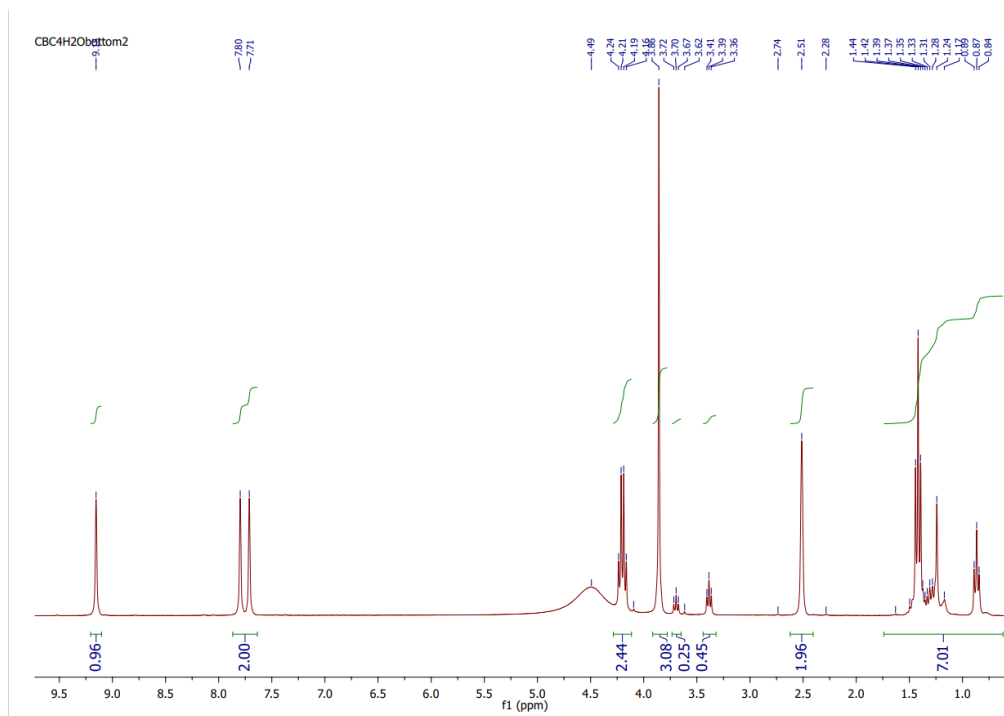

**Figure S3:**  $^1\text{H}$  NMR of the lower IL phase of 1-ethyl-3-methylimidazolium hydrogensulfate, 1-butanol and *n*-tetradecane mixture at 323 K

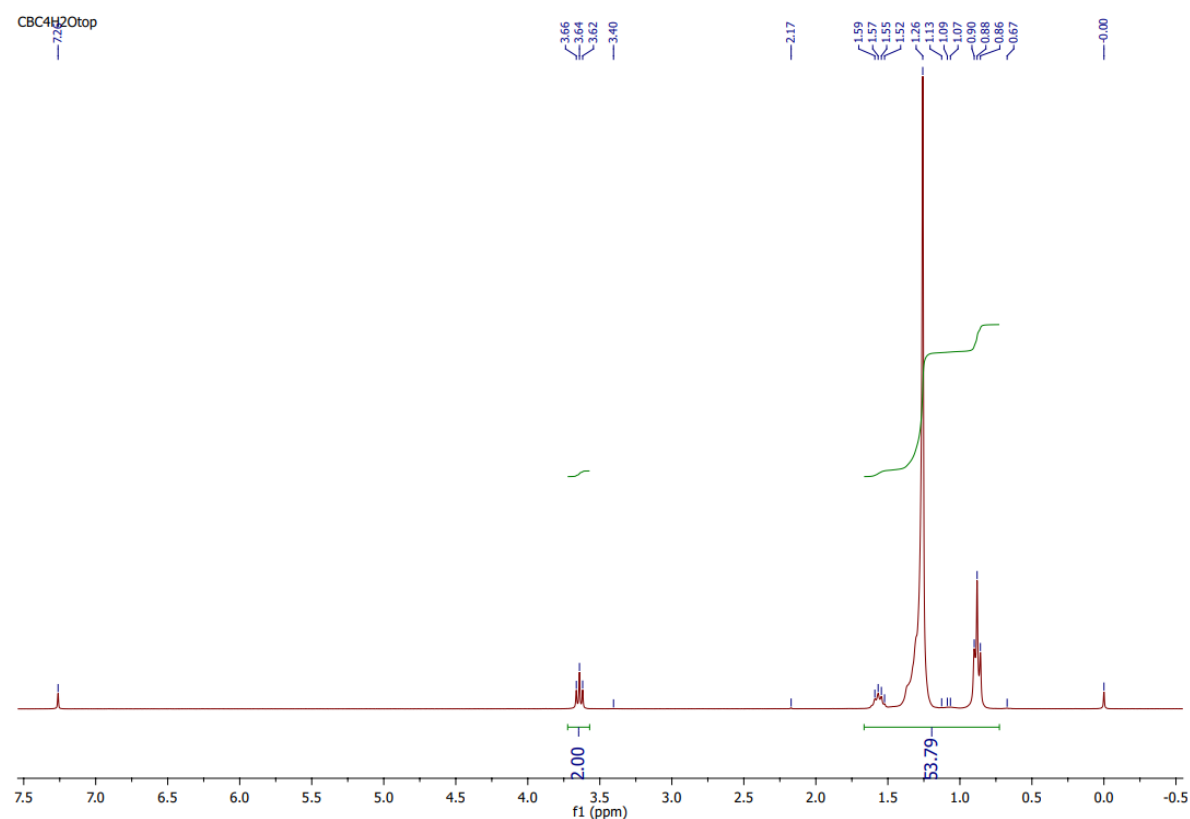

**Figure S4:**  $^1\text{H}$  NMR of the upper alkane phase of 1-ethyl-3-methylimidazolium hydrogensulfate, 1-butanol and *n*-tetradecane mixtures at 323 K

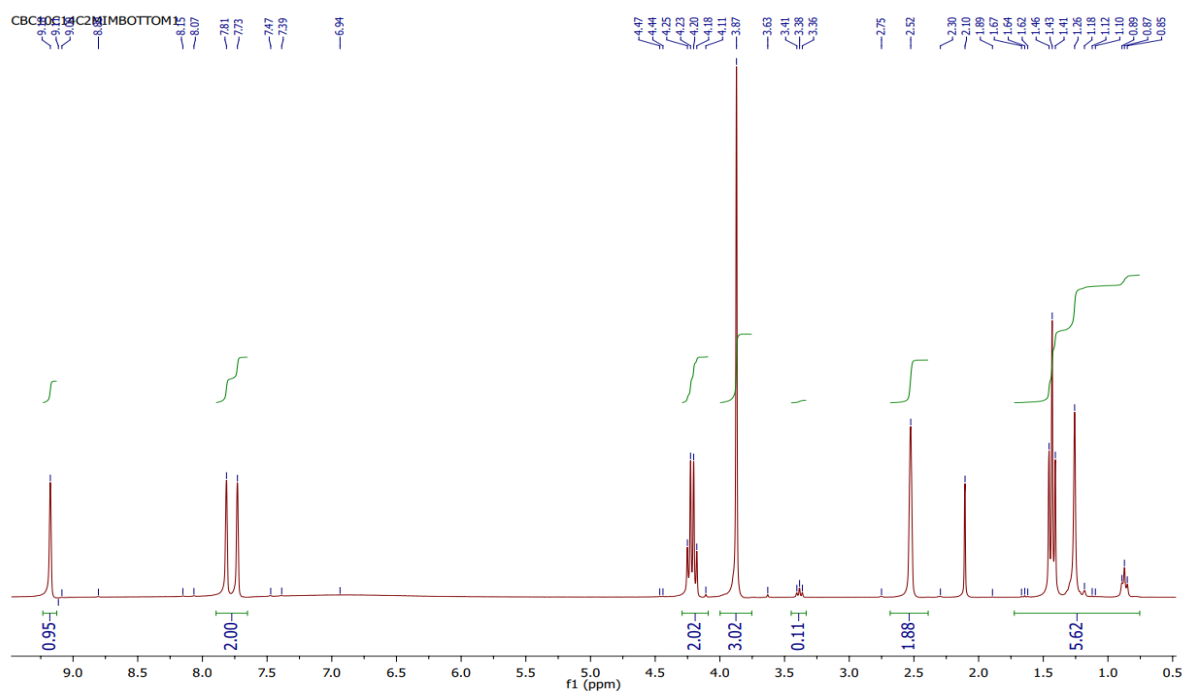

**Figure S5:**  $^1\text{H}$  NMR of the lower IL phase of 1-ethyl-3-methylimidazolium hydrogensulfate, 1-decanol and *n*-tetradecane mixture at 393 K

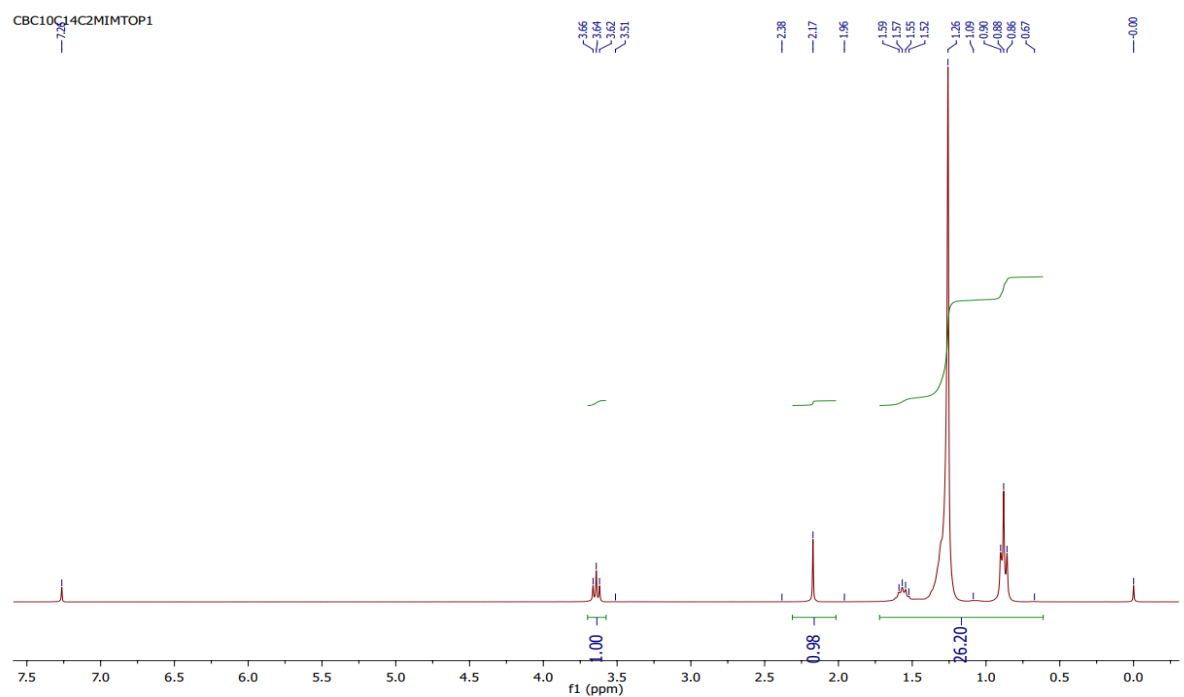

**Figure S6:**  $^1\text{H}$  NMR of the lower IL phase of 1-ethyl-3-methylimidazolium hydrogensulfate, 1-decanol and *n*-tetradecane mixture at 393 K
