# Supplementary material
Source: MDPI journal article supplement (https://www.mdpi.com/2673-7264/2/3/15)
Supplement: s1 [file s1]

Archive with 1 entries (1 files):
- thermo-1801403-supplementary.pdf
